# Supplementary material
Source: Research Square preprint supplement (doi:10.21203/rs.3.rs-9142767/v1)
Supplement: Supplementary file 1 [file 8ca5e20a24fc12b432e7bf3d.docx]

**SUPPLEMENTS**


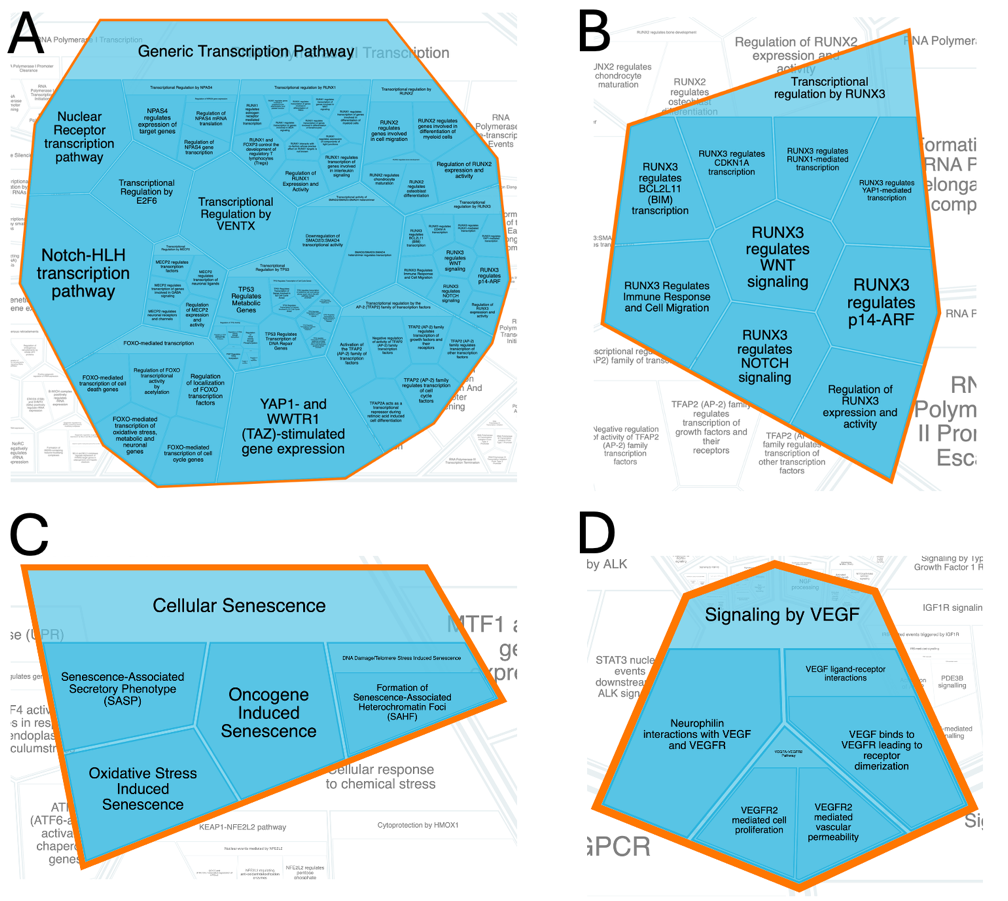


**Figure S1. Reactome database pathways**. (**A**) Generic transcriptomic pathway. (**B**)Transcriptional regulation by RUNX3. (**C**) Cellular senescence. (**D**) Signaling by VEGF. Adapted from Fabregat A, Sidiropoulos K, Viteri G, et al. Reactome diagram viewer: data structures and strategies to boost performance. *Bioinformatics*. Apr 1 2018;34(7):1208-1214. doi:10.1093/bioinformatics/btx752


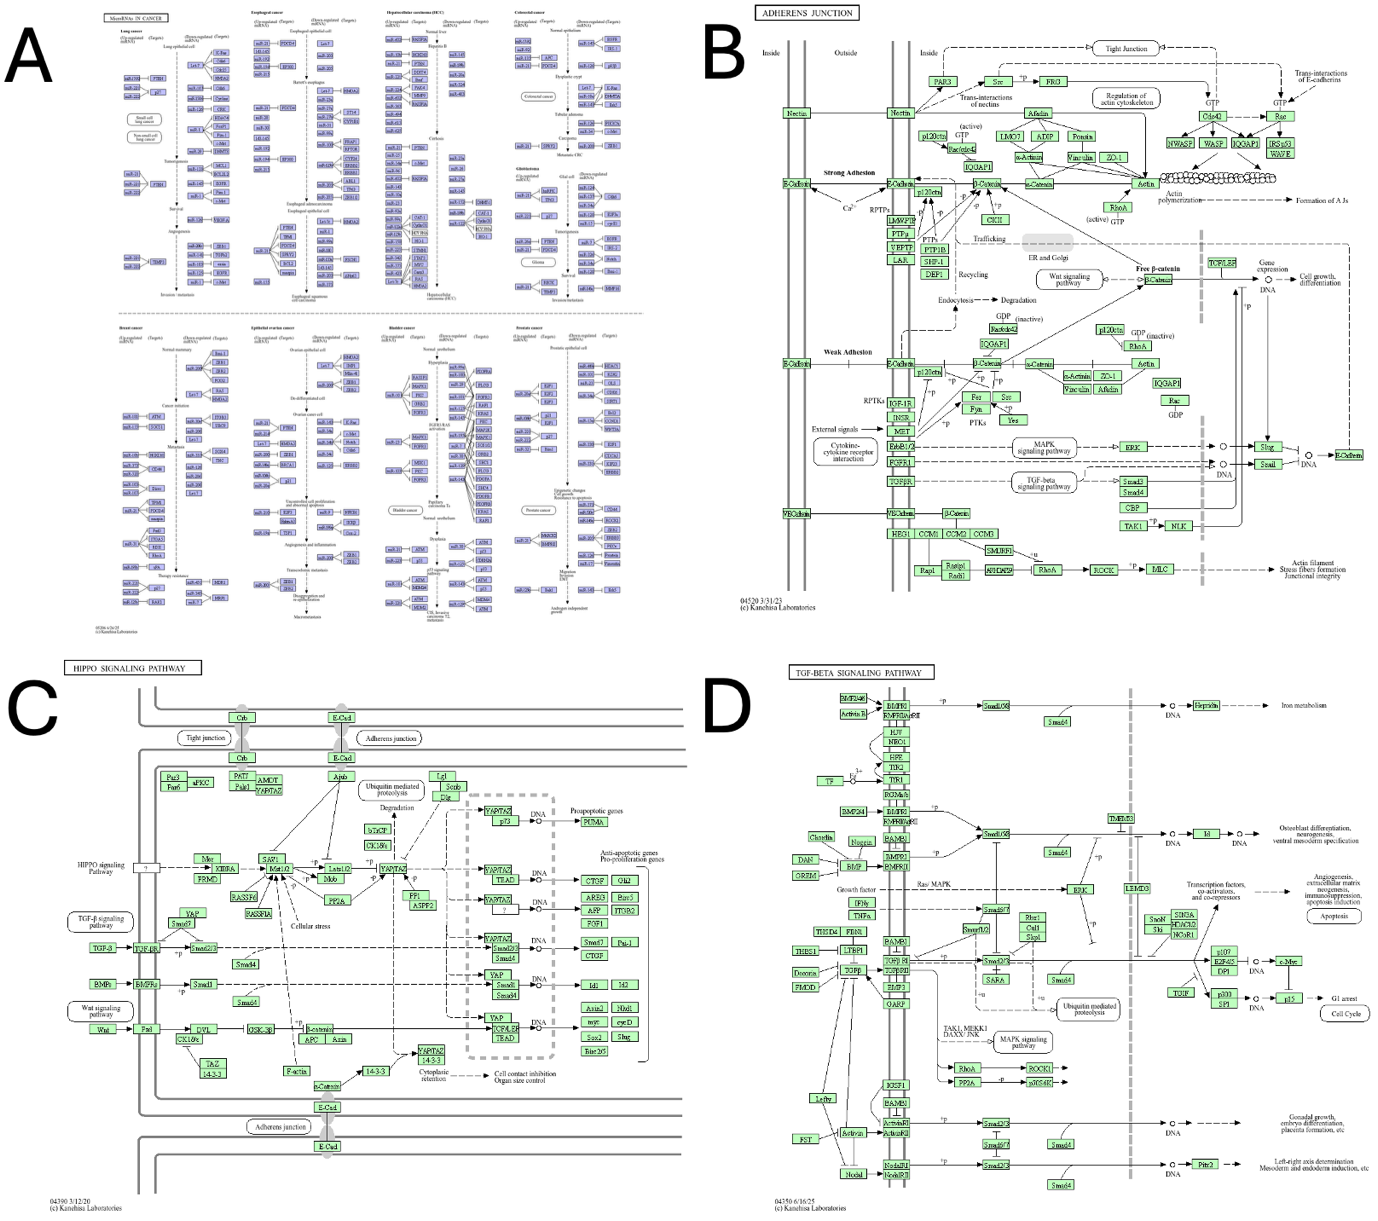


**Figure S2. KEGG database pathways**. (**A**) MicroRNAs in cancer. (**B**) Adherens junction. (**C**) HIPPO signaling pathway. (**D**) TGF-beta signaling pathway. Adapted from Kanehisa M, Goto S. KEGG: kyoto encyclopedia of genes and genomes. *Nucleic Acids Res*. Jan 1 2000;28(1):27-30. doi:10.1093/nar/28.1.27

**Figure S3. miRNAs associated with different molecular pathways in the Reactome and KEGG databases, likely prognostic factors for overall survival in GBM (Excel database).**
