# Supplementary material
Source: Research Square preprint supplement (doi:10.21203/rs.3.rs-9142767/v1)
Supplement: Supplementary file 2 [file 8cafe1d27e9b07492a7c5e6d.xlsx]

## Sheet: All miRNAS and Pathways
		REACTOME miRNAS																KEGG miRNAS
		Generic Transcription Pathway				Signaling by VEGF				Cellular senescence				Transcriptional regulation by RUNX3				miRNAs in cancer				Adherens junction				Hippo signaling pathway				TGF-beta signaling pathway
		miRNA	Ranking	Z-score		miRNA	Ranking	Z-score		miRNA	Ranking	Z-score		miRNA	Ranking	Z-score		miRNA	Ranking	Z-score		miRNA	Ranking	Z-score		miRNA	Ranking	Z-score		miRNA	Ranking	Z-score
	1	hsa-miR-6503-5p	9	2.623	1	hsa-miR-585-3p	30	2.343	1	hsa-miR-196b-5p	7	2.681	1	hsa-miR-221-3p	229	1.209	1	hsa-miR-24-2-5p	5	2.767	1	hsa-miR-585-3p	30	2.343	1	hsa-miR-1295a	52	2.124	1	hsa-miR-196b-5p	7	2.681
	2	hsa-miR-96-5p	17	2.416	2	hsa-miR-155-5p	364	0.875	2	hsa-miR-6748-5p	31	2.343	2	hsa-miR-301a-3p	274	1.123	2	hsa-miR-196b-5p	7	2.681	2	hsa-miR-193a-3p	39	2.307	2	hsa-miR-21-5p	149	1.555	2	hsa-miR-1200	26	2.343
	3	hsa-miR-579-3p	37	2.343	3	hsa-miR-135a-5p	388	0.801	3	hsa-miR-450a-2-3p	107	1.742	3	hsa-miR-708-5p	332	0.924	3	hsa-miR-96-5p	17	2.416	3	hsa-miR-5701	51	2.124	3	hsa-miR-221-3p	229	1.209	3	hsa-miR-5571-3p	87	1.885
	4	hsa-miR-182-5p	73	1.891	4	hsa-miR-200b-3p	433	0.724	4	hsa-miR-363-5p	127	1.672	4	hsa-miR-200b-3p	433	0.724	4	hsa-miR-585-3p	30	2.343	4	hsa-miR-182-5p	73	1.891	4	hsa-miR-6505-5p	324	0.959	4	hsa-miR-21-5p	149	1.555
	5	hsa-let-7f-2-3p	106	1.743	5	hsa-miR-429	453	0.678	5	hsa-miR-21-5p	149	1.555	5	hsa-miR-429	453	0.678	5	hsa-miR-193a-3p	39	2.307	5	hsa-miR-450a-2-3p	107	1.742	5	hsa-miR-708-5p	332	0.924	5	hsa-miR-135a-5p	388	0.801
	6	hsa-miR-101-5p	124	1.672	6	hsa-miR-144-5p	492	0.66	6	hsa-miR-6766-5p	155	1.53	6	hsa-miR-144-5p	492	0.66	6	hsa-miR-6734-3p	46	2.13	6	hsa-miR-125b-5p	224	1.242	6	hsa-miR-135a-5p	388	0.801	6	hsa-miR-98-5p	421	0.749
	7	hsa-miR-3191-5p	126	1.672	7	hsa-miR-365a-3p	508	0.622	7	hsa-miR-100-5p	217	1.292	7	hsa-miR-365a-3p	508	0.622	7	hsa-miR-4999-5p	57	2.123	7	hsa-miR-221-3p	229	1.209	7	hsa-miR-152-3p	424	0.743	7	hsa-miR-3661	430	0.728
	8	hsa-miR-21-5p	149	1.555	8	hsa-miR-185-5p	516	0.601	8	hsa-miR-125b-5p	224	1.242	8	hsa-miR-34a-5p	509	0.622	8	hsa-miR-182-5p	73	1.891	8	hsa-miR-93-3p	263	1.162	8	hsa-miR-3661	430	0.728	8	hsa-miR-200b-3p	433	0.724
	9	hsa-miR-1185-2-3p	151	1.544	9	hsa-miR-374a-3p	871	0.089	9	hsa-miR-221-3p	229	1.209	9	hsa-miR-148a-3p	522	0.582	9	hsa-let-7c-3p	97	1.807	9	hsa-miR-193b-3p	366	0.868	9	hsa-miR-200b-3p	433	0.724	9	hsa-miR-22-3p	434	0.717
	10	hsa-miR-6797-3p	153	1.532	10	hsa-miR-133b	1313	-0.135	10	hsa-miR-301a-3p	274	1.123	10	hsa-miR-9-5p	578	0.479	10	hsa-miR-5581-3p	120	1.672	10	hsa-miR-542-5p	389	0.8	10	hsa-miR-22-3p	434	0.717	10	hsa-miR-452-5p	444	0.699
	11	hsa-miR-6766-5p	155	1.53	11	hsa-miR-203a-3p	1372	-0.233	11	hsa-miR-223-3p	281	1.098	11	hsa-miR-454-3p	638	0.356	11	hsa-miR-6885-3p	121	1.672	11	hsa-miR-200b-3p	433	0.724	11	hsa-miR-429	453	0.678	11	hsa-miR-144-5p	492	0.66
	12	hsa-miR-6853-3p	168	1.483	12	hsa-miR-126-3p	1446	-0.372	12	hsa-miR-6760-5p	325	0.955	12	hsa-miR-488-3p	702	0.279	12	hsa-miR-146b-5p	137	1.635	12	hsa-miR-22-3p	434	0.717	12	hsa-miR-34a-5p	509	0.622	12	hsa-miR-34a-5p	509	0.622
	13	hsa-miR-382-3p	181	1.453	13	hsa-miR-200a-3p	1464	-0.403	13	hsa-miR-760	339	0.906	13	hsa-miR-675-5p	704	0.277	13	hsa-miR-21-5p	149	1.555	13	hsa-miR-429	453	0.678	13	hsa-miR-148a-3p	522	0.582	13	hsa-miR-185-5p	516	0.601
	14	hsa-miR-1287-5p	188	1.404	14	hsa-miR-224-5p	1477	-0.425	14	hsa-miR-155-5p	364	0.875	14	hsa-miR-615-3p	816	0.2	14	hsa-miR-6874-3p	180	1.454	14	hsa-miR-144-5p	492	0.66	14	hsa-miR-29b-3p	577	0.479	14	hsa-miR-148a-3p	522	0.582
	15	hsa-miR-10b-5p	197	1.346	15	hsa-miR-125a-5p	1481	-0.432	15	hsa-miR-193b-3p	366	0.868	15	hsa-miR-208b-3p	878	0.078	15	hsa-miR-10b-5p	197	1.346	15	hsa-miR-34a-5p	509	0.622	15	hsa-miR-29a-3p	610	0.426	15	hsa-miR-29b-3p	577	0.479
	16	hsa-miR-301b-5p	207	1.316	16	hsa-miR-668-3p	1553	-0.566	16	hsa-miR-222-3p	392	0.777	16	hsa-miR-30a-3p	1237	-0.003	16	hsa-miR-200b-5p	203	1.316	16	hsa-miR-1268b	513	0.609	16	hsa-miR-374b-5p	625	0.381	16	hsa-miR-374b-5p	625	0.381
	17	hsa-miR-3616-3p	210	1.316	17	hsa-miR-543	1617	-0.69	17	hsa-miR-98-5p	421	0.749	17	hsa-miR-106a-5p	1262	-0.034	17	hsa-miR-100-5p	217	1.292	17	hsa-miR-148a-3p	522	0.582	17	hsa-miR-6740-5p	658	0.351	17	hsa-miR-4766-3p	664	0.351
	18	hsa-miR-100-5p	217	1.292	18	hsa-miR-139-5p	1630	-0.71	18	hsa-miR-152-3p	424	0.743	18	hsa-miR-892b	1288	-0.093	18	hsa-miR-125b-5p	224	1.242	18	hsa-miR-9-3p	565	0.52	18	hsa-miR-891b	684	0.318	18	hsa-miR-29b-1-5p	679	0.325
	19	hsa-miR-125b-5p	224	1.242	19	hsa-miR-625-3p	1658	-0.764	19	hsa-miR-499b-3p	425	0.739	19	hsa-miR-324-5p	1300	-0.11	19	hsa-miR-221-3p	229	1.209	19	hsa-miR-597-5p	581	0.469	19	hsa-let-7a-3p	713	0.248	19	hsa-miR-6733-5p	746	0.238
	20	hsa-miR-488-5p	227	1.222	20	hsa-miR-30c-5p	1664	-0.776	20	hsa-miR-200b-3p	433	0.724	20	hsa-miR-30e-3p	1310	-0.124	20	hsa-miR-183-5p	232	1.204	20	hsa-miR-1-3p	611	0.423	20	hsa-miR-200a-5p	807	0.213	20	hsa-miR-19a-3p	884	0.066
	21	hsa-miR-221-3p	229	1.209	21	hsa-miR-200c-3p	1667	-0.78	21	hsa-miR-429	453	0.678	21	hsa-miR-186-5p	1321	-0.146	21	hsa-miR-16-2-3p	275	1.121	21	hsa-miR-6885-5p	670	0.351	21	hsa-miR-138-5p	834	0.146	21	hsa-miR-6750-5p	964	-0.002
	22	hsa-miR-509-3p	230	1.206	22	hsa-miR-369-3p	1690	-0.828	22	hsa-miR-1296-3p	475	0.663	22	hsa-miR-146a-5p	1331	-0.164	22	hsa-miR-223-3p	281	1.098	22	hsa-miR-4508	686	0.313	22	hsa-miR-19a-3p	884	0.066	22	hsa-miR-519d-3p	1095	-0.002
	23	hsa-miR-301a-3p	274	1.123	23	hsa-miR-143-3p	1698	-0.84	23	hsa-miR-144-5p	492	0.66	23	hsa-miR-208a-3p	1361	-0.215	23	hsa-miR-301a-5p	323	0.97	23	hsa-miR-19a-3p	884	0.066	23	hsa-miR-6750-5p	964	-0.002	23	hsa-miR-93-5p	1243	-0.006
	24	hsa-miR-223-3p	281	1.098	24	hsa-miR-582-5p	1729	-0.889	24	hsa-miR-34a-5p	509	0.622	24	hsa-miR-30d-3p	1365	-0.215	24	hsa-miR-16-1-3p	328	0.943	24	hsa-miR-652-3p	1242	-0.004	24	hsa-miR-302a-5p	1000	-0.002	24	hsa-miR-451a	1279	-0.075
	25	hsa-miR-301a-5p	323	0.97	25	hsa-miR-195-5p	1741	-0.909	25	hsa-miR-185-5p	516	0.601	25	hsa-miR-1179	1388	-0.256	25	hsa-miR-664b-5p	331	0.925	25	hsa-miR-133b	1313	-0.135	25	hsa-miR-4668-5p	1045	-0.002	25	hsa-miR-106b-5p	1330	-0.164
	26	hsa-miR-708-5p	332	0.924	26	hsa-miR-184	1749	-0.924	26	hsa-miR-212-3p	520	0.593	26	hsa-miR-449a	1397	-0.274	26	hsa-miR-708-5p	332	0.924	26	hsa-miR-4260	1328	-0.163	26	hsa-miR-934	1069	-0.002	26	hsa-miR-146a-5p	1331	-0.164
	27	hsa-miR-760	339	0.906	27	hsa-miR-654-3p	1757	-0.932	27	hsa-miR-148a-3p	522	0.582	27	hsa-miR-3605-3p	1418	-0.311	27	hsa-miR-3609	334	0.915	27	hsa-miR-146a-5p	1331	-0.164	27	hsa-miR-30a-3p	1237	-0.003	27	hsa-miR-203a-3p	1372	-0.233
	28	hsa-miR-671-5p	358	0.891	28	hsa-miR-15b-5p	1762	-0.945	28	hsa-miR-6090	538	0.555	28	hsa-miR-590-5p	1426	-0.327	28	hsa-miR-6818-5p	345	0.897	28	hsa-miR-203a-3p	1372	-0.233	28	hsa-miR-93-5p	1243	-0.006	28	hsa-miR-584-5p	1391	-0.26
	29	hsa-miR-155-5p	364	0.875	29	hsa-miR-331-3p	1788	-1.005	29	hsa-miR-6745	551	0.555	29	hsa-miR-34a-3p	1435	-0.348	29	hsa-miR-155-5p	364	0.875	29	hsa-miR-449a	1397	-0.274	29	hsa-miR-154-5p	1289	-0.094	29	hsa-miR-675-3p	1400	-0.283
	30	hsa-miR-193b-3p	366	0.868	30	hsa-miR-361-5p	1789	-1.005	30	hsa-miR-9-3p	565	0.52	30	hsa-miR-126-3p	1446	-0.372	30	hsa-miR-193b-3p	366	0.868	30	hsa-miR-34a-3p	1435	-0.348	30	hsa-miR-765	1303	-0.113	30	hsa-let-7c-5p	1409	-0.295
	31	hsa-miR-135a-5p	388	0.801	31	hsa-miR-34c-5p	1845	-1.176	31	hsa-miR-29b-3p	577	0.479	31	hsa-miR-16-5p	1463	-0.398	31	hsa-miR-541-5p	376	0.83	31	hsa-miR-204-5p	1440	-0.355	31	hsa-miR-30e-3p	1310	-0.124	31	hsa-miR-590-5p	1426	-0.327
	32	hsa-miR-216b-5p	390	0.799	32	hsa-miR-31-3p	1862	-1.223	32	hsa-miR-125b-1-3p	580	0.47	32	hsa-miR-200a-3p	1464	-0.403	32	hsa-miR-135a-5p	388	0.801	32	hsa-miR-550a-3p	1442	-0.361	32	hsa-miR-15a-5p	1325	-0.157	32	hsa-miR-34a-3p	1435	-0.348
	33	hsa-miR-222-3p	392	0.777	33	hsa-miR-101-3p	1876	-1.302	33	hsa-miR-29a-3p	610	0.426	33	hsa-miR-92a-3p	1466	-0.406	33	hsa-miR-222-3p	392	0.777	33	hsa-miR-133a-3p	1451	-0.378	33	hsa-miR-146a-5p	1331	-0.164	33	hsa-miR-550a-3p	1442	-0.361
	34	hsa-miR-770-5p	413	0.774	34	hsa-miR-206	1898	-1.369	34	hsa-miR-1276	626	0.381	34	hsa-miR-224-5p	1477	-0.425	34	hsa-miR-98-5p	421	0.749	34	hsa-miR-27a-3p	1461	-0.391	34	hsa-miR-30d-3p	1365	-0.215	34	hsa-miR-126-3p	1446	-0.372
	35	hsa-miR-1261	415	0.768	35	hsa-miR-145-5p	1901	-1.39	35	hsa-miR-130b-3p	631	0.37	35	hsa-miR-18a-5p	1483	-0.438	35	hsa-miR-152-3p	424	0.743	35	hsa-miR-200a-3p	1464	-0.403	35	hsa-miR-203a-3p	1372	-0.233	35	hsa-miR-27a-3p	1461	-0.391
	36	hsa-miR-98-5p	421	0.749	36	hsa-miR-34c-3p	1934	-1.657	36	hsa-miR-454-3p	638	0.356	36	hsa-miR-301b-3p	1500	-0.469	36	hsa-miR-200b-3p	433	0.724	36	hsa-miR-224-5p	1477	-0.425	36	hsa-miR-590-5p	1426	-0.327	36	hsa-miR-125a-5p	1481	-0.432
	37	hsa-miR-152-3p	424	0.743	37	hsa-miR-124-3p	1944	-1.758	37	hsa-miR-675-5p	704	0.277	37	hsa-miR-499a-5p	1516	-0.502	37	hsa-miR-22-3p	434	0.717	37	hsa-miR-875-5p	1480	-0.43	37	hsa-miR-424-5p	1431	-0.34	37	hsa-miR-503-3p	1525	-0.524
	38	hsa-miR-766-5p	431	0.725	38	hsa-miR-199a-3p	1950	-1.81	38	hsa-miR-615-3p	816	0.2	38	hsa-miR-653-5p	1520	-0.511	38	hsa-miR-452-5p	444	0.699	38	hsa-miR-125a-5p	1481	-0.432	38	hsa-miR-34a-3p	1435	-0.348	38	hsa-miR-27b-3p	1533	-0.539
	39	hsa-miR-200b-3p	433	0.724	39	hsa-miR-31-5p	1965	-2.398	39	hsa-miR-503-5p	833	0.146	39	hsa-miR-140-5p	1580	-0.6	39	hsa-miR-21-3p	450	0.682	39	hsa-miR-150-3p	1490	-0.449	39	hsa-miR-204-5p	1440	-0.355	39	hsa-miR-378a-3p	1559	-0.575
	40	hsa-miR-22-3p	434	0.717					40	hsa-miR-138-5p	834	0.146	40	hsa-miR-95-3p	1605	-0.668	40	hsa-miR-429	453	0.678	40	hsa-miR-181a-5p	1519	-0.505	40	hsa-miR-326	1441	-0.36	40	hsa-miR-140-5p	1580	-0.6
	41	hsa-miR-1185-1-3p	440	0.705					41	hsa-miR-208b-3p	878	0.078	41	hsa-miR-92a-1-5p	1636	-0.715	41	hsa-miR-144-5p	492	0.66	41	hsa-miR-486-5p	1522	-0.514	41	hsa-miR-6772-3p	1444	-0.364	41	hsa-miR-194-5p	1626	-0.704
	42	hsa-miR-452-5p	444	0.699					42	hsa-miR-181b-5p	893	0.051	42	hsa-miR-199a-5p	1643	-0.725	42	hsa-miR-25-3p	497	0.656	42	hsa-miR-27b-3p	1533	-0.539	42	hsa-miR-4677-3p	1456	-0.387	42	hsa-miR-20a-5p	1642	-0.725
	43	hsa-miR-21-3p	450	0.682					43	hsa-miR-519d-3p	1095	-0.002	43	hsa-miR-30c-5p	1664	-0.776	43	hsa-miR-365a-3p	508	0.622	43	hsa-miR-1268a	1572	-0.594	43	hsa-miR-27a-3p	1461	-0.391	43	hsa-miR-199a-5p	1643	-0.725
	44	hsa-miR-429	453	0.678					44	hsa-miR-6812-5p	1133	-0.002	44	hsa-miR-200c-3p	1667	-0.78	44	hsa-miR-34a-5p	509	0.622	44	hsa-miR-142-5p	1576	-0.597	44	hsa-miR-16-5p	1463	-0.398	44	hsa-miR-20b-5p	1666	-0.778
	45	hsa-miR-3064-3p	480	0.663					45	hsa-miR-1178-3p	1138	-0.002	45	hsa-miR-423-3p	1673	-0.791	45	hsa-miR-1268b	513	0.609	45	hsa-miR-140-5p	1580	-0.6	45	hsa-miR-200a-3p	1464	-0.403	45	hsa-miR-200c-3p	1667	-0.78
	46	hsa-miR-144-5p	492	0.66					46	hsa-miR-4483	1141	-0.002	46	hsa-miR-143-3p	1698	-0.84	46	hsa-miR-185-5p	516	0.601	46	hsa-miR-409-3p	1602	-0.663	46	hsa-miR-497-5p	1472	-0.415	46	hsa-miR-17-5p	1712	-0.859
	47	hsa-miR-6820-5p	495	0.657					47	hsa-miR-572	1146	-0.002	47	hsa-miR-17-5p	1712	-0.859	47	hsa-miR-33b-5p	521	0.592	47	hsa-miR-194-5p	1626	-0.704	47	hsa-miR-224-5p	1477	-0.425	47	hsa-miR-15b-5p	1762	-0.945
	48	hsa-miR-34a-5p	509	0.622					48	hsa-miR-6828-3p	1193	-0.002	48	hsa-miR-331-3p	1788	-1.005	48	hsa-miR-148a-3p	522	0.582	48	hsa-miR-199a-5p	1643	-0.725	48	hsa-miR-18a-5p	1483	-0.438	48	hsa-miR-205-5p	1769	-0.954
	49	hsa-miR-185-5p	516	0.601					49	hsa-miR-6827-5p	1216	-0.003	49	hsa-miR-130a-3p	1801	-1.036	49	hsa-miR-9-3p	565	0.52	49	hsa-miR-200c-3p	1667	-0.78	49	hsa-miR-181a-5p	1519	-0.505	49	hsa-miR-379-3p	1796	-1.024
	50	hsa-miR-212-3p	520	0.593					50	hsa-miR-652-3p	1242	-0.004	50	hsa-miR-487b-3p	1815	-1.076	50	hsa-miR-29b-3p	577	0.479	50	hsa-miR-592	1682	-0.802	50	hsa-miR-503-3p	1525	-0.524	50	hsa-miR-130a-3p	1801	-1.036
	51	hsa-miR-33b-5p	521	0.592					51	hsa-miR-93-5p	1243	-0.006	51	hsa-miR-214-3p	1856	-1.203	51	hsa-miR-9-5p	578	0.479	51	hsa-miR-143-3p	1698	-0.84	51	hsa-miR-378a-3p	1559	-0.575	51	hsa-miR-487b-3p	1815	-1.076
	52	hsa-miR-148a-3p	522	0.582					52	hsa-miR-106a-5p	1262	-0.034	52	hsa-miR-574-3p	1897	-1.363	52	hsa-miR-125b-1-3p	580	0.47	52	hsa-miR-205-5p	1769	-0.954	52	hsa-miR-199a-5p	1643	-0.725	52	hsa-miR-31-3p	1862	-1.223
	53	hsa-miR-29b-3p	577	0.479					53	hsa-miR-629-5p	1267	-0.054	53	hsa-miR-206	1898	-1.369	53	hsa-miR-219a-5p	603	0.442	53	hsa-miR-128-3p	1795	-1.024	53	hsa-miR-323a-5p	1665	-0.778	53	hsa-miR-33a-3p	1888	-1.338
	54	hsa-miR-125b-1-3p	580	0.47					54	hsa-miR-451a	1279	-0.075	54	hsa-miR-145-5p	1901	-1.39	54	hsa-miR-29a-3p	610	0.426	54	hsa-miR-130a-3p	1801	-1.036	54	hsa-miR-143-3p	1698	-0.84	54	hsa-miR-574-3p	1897	-1.363
	55	hsa-miR-29a-3p	610	0.426					55	hsa-miR-892b	1288	-0.093	55	hsa-miR-34c-3p	1934	-1.657	55	hsa-miR-1-3p	611	0.423	55	hsa-miR-34b-5p	1805	-1.04	55	hsa-miR-195-5p	1741	-0.909	55	hsa-miR-145-5p	1901	-1.39
	56	hsa-miR-197-3p	622	0.386					56	hsa-miR-324-5p	1300	-0.11					56	hsa-miR-153-3p	616	0.407	56	hsa-miR-3158-3p	1813	-1.066	56	hsa-miR-548t-3p	1746	-0.915	56	hsa-miR-323a-3p	1955	-1.884
	57	hsa-miR-1276	626	0.381					57	hsa-miR-196a-5p	1314	-0.135					57	hsa-miR-211-5p	672	0.347	57	hsa-miR-7106-3p	1836	-1.126	57	hsa-miR-15b-5p	1762	-0.945	57	hsa-miR-135b-5p	1963	-2.256
	58	hsa-miR-130b-3p	631	0.37					58	hsa-miR-186-5p	1321	-0.146					58	hsa-miR-29b-1-5p	679	0.325	58	hsa-miR-885-5p	1838	-1.144	58	hsa-miR-205-5p	1769	-0.954
	59	hsa-miR-454-3p	638	0.356					59	hsa-miR-15a-5p	1325	-0.157					59	hsa-miR-624-5p	707	0.269	59	hsa-miR-744-5p	1844	-1.17	59	hsa-miR-548aa	1797	-1.028
	60	hsa-miR-346	691	0.303					60	hsa-miR-4260	1328	-0.163					60	hsa-let-7a-3p	713	0.248	60	hsa-miR-34c-5p	1845	-1.176	60	hsa-miR-130a-3p	1801	-1.036
	61	hsa-miR-376b-3p	696	0.289					61	hsa-miR-106b-5p	1330	-0.164					61	hsa-miR-6733-5p	746	0.238	61	hsa-miR-214-3p	1856	-1.203	61	hsa-miR-34b-5p	1805	-1.04
	62	hsa-miR-675-5p	704	0.277					62	hsa-miR-146a-5p	1331	-0.164					62	hsa-miR-1271-5p	802	0.227	62	hsa-miR-101-3p	1876	-1.302	62	hsa-miR-487b-3p	1815	-1.076
	63	hsa-let-7a-3p	713	0.248					63	hsa-miR-29c-3p	1354	-0.214					63	hsa-miR-663a	805	0.215	63	hsa-miR-33a-3p	1888	-1.338	63	hsa-miR-3648	1818	-1.079
	64	hsa-miR-5694	749	0.238					64	hsa-miR-208a-3p	1361	-0.215					64	hsa-miR-200a-5p	807	0.213	64	hsa-miR-574-3p	1897	-1.363	64	hsa-miR-744-5p	1844	-1.17
	65	hsa-miR-586	787	0.238					65	hsa-miR-4766-5p	1362	-0.215					65	hsa-miR-503-5p	833	0.146	65	hsa-miR-206	1898	-1.369	65	hsa-miR-34c-5p	1845	-1.176
	66	hsa-miR-200a-5p	807	0.213					66	hsa-miR-203a-3p	1372	-0.233					66	hsa-miR-138-5p	834	0.146	66	hsa-miR-145-5p	1901	-1.39	66	hsa-miR-101-3p	1876	-1.302
	67	hsa-miR-615-3p	816	0.2					67	hsa-miR-6850-3p	1381	-0.248					67	hsa-miR-340-5p	835	0.142	67	hsa-miR-218-5p	1927	-1.553	67	hsa-miR-33a-3p	1888	-1.338
	68	hsa-miR-503-5p	833	0.146					68	hsa-miR-18a-3p	1394	-0.269					68	hsa-miR-144-3p	862	0.105	68	hsa-miR-34c-3p	1934	-1.657	68	hsa-miR-494-3p	1896	-1.362
	69	hsa-miR-138-5p	834	0.146					69	hsa-miR-449a	1397	-0.274					69	hsa-miR-208b-3p	878	0.078	69	hsa-miR-124-3p	1944	-1.758	69	hsa-miR-574-3p	1897	-1.363
	70	hsa-miR-19a-3p	884	0.066					70	hsa-let-7c-5p	1409	-0.295					70	hsa-miR-19a-3p	884	0.066	70	hsa-miR-323a-3p	1955	-1.884	70	hsa-miR-145-5p	1901	-1.39
	71	hsa-miR-30a-5p	886	0.063					71	hsa-miR-4507	1413	-0.301					71	hsa-miR-30a-5p	886	0.063	71	hsa-miR-31-5p	1965	-2.398	71	hsa-miR-493-3p	1931	-1.622
	72	hsa-miR-181b-5p	893	0.051					72	hsa-miR-424-5p	1431	-0.34					72	hsa-miR-181b-5p	893	0.051					72	hsa-miR-34c-3p	1934	-1.657
	73	hsa-miR-376a-3p	906	0.02					73	hsa-miR-550a-3p	1442	-0.361					73	hsa-miR-7-5p	899	0.036					73	hsa-miR-323a-3p	1955	-1.884
	74	hsa-miR-518e-5p	1055	-0.002					74	hsa-miR-27a-3p	1461	-0.391					74	hsa-miR-4500	910	0.014					74	hsa-miR-135b-5p	1963	-2.256
	75	hsa-miR-519e-5p	1057	-0.002					75	hsa-miR-16-5p	1463	-0.398					75	hsa-miR-6730-3p	996	-0.002					75	hsa-miR-31-5p	1965	-2.398
	76	hsa-miR-5696	1087	-0.002					76	hsa-miR-200a-3p	1464	-0.403					76	hsa-miR-19b-1-5p	1053	-0.002
	77	hsa-miR-518f-5p	1093	-0.002					77	hsa-miR-497-5p	1472	-0.415					77	hsa-miR-512-5p	1066	-0.002
	78	hsa-miR-520c-5p	1094	-0.002					78	hsa-miR-125a-5p	1481	-0.432					78	hsa-miR-4524b-5p	1092	-0.002
	79	hsa-miR-519d-3p	1095	-0.002					79	hsa-let-7g-5p	1485	-0.438					79	hsa-miR-519d-3p	1095	-0.002
	80	hsa-miR-523-5p	1096	-0.002					80	hsa-miR-301b-3p	1500	-0.469					80	hsa-miR-572	1146	-0.002
	81	hsa-miR-4483	1141	-0.002					81	hsa-miR-320b	1510	-0.493					81	hsa-miR-6875-5p	1147	-0.002
	82	hsa-miR-519a-5p	1173	-0.002					82	hsa-miR-30e-5p	1512	-0.496					82	hsa-miR-1233-5p	1227	-0.003
	83	hsa-miR-519c-5p	1174	-0.002					83	hsa-miR-499a-5p	1516	-0.502					83	hsa-miR-448	1236	-0.003
	84	hsa-miR-518d-5p	1177	-0.002					84	hsa-miR-181a-5p	1519	-0.505					84	hsa-miR-30a-3p	1237	-0.003
	85	hsa-miR-526b-3p	1189	-0.002					85	hsa-miR-653-5p	1520	-0.511					85	hsa-miR-93-5p	1243	-0.006
	86	hsa-miR-6855-3p	1194	-0.002					86	hsa-miR-877-5p	1573	-0.595					86	hsa-miR-33a-5p	1244	-0.011
	87	hsa-miR-30a-3p	1237	-0.003					87	hsa-miR-320c	1587	-0.628					87	hsa-miR-106a-5p	1262	-0.034
	88	hsa-miR-652-3p	1242	-0.004					88	hsa-miR-330-3p	1598	-0.66					88	hsa-miR-339-3p	1268	-0.057
	89	hsa-miR-93-5p	1243	-0.006					89	hsa-miR-543	1617	-0.69					89	hsa-miR-425-5p	1269	-0.057
	90	hsa-miR-33a-5p	1244	-0.011					90	hsa-miR-194-5p	1626	-0.704					90	hsa-miR-32-5p	1274	-0.063
	91	hsa-miR-425-3p	1246	-0.015					91	hsa-miR-20a-5p	1642	-0.725					91	hsa-miR-3529-3p	1276	-0.071
	92	hsa-miR-106a-5p	1262	-0.034					92	hsa-miR-30c-5p	1664	-0.776					92	hsa-miR-451a	1279	-0.075
	93	hsa-miR-629-5p	1267	-0.054					93	hsa-miR-20b-5p	1666	-0.778					93	hsa-miR-892b	1288	-0.093
	94	hsa-miR-425-5p	1269	-0.057					94	hsa-miR-200c-3p	1667	-0.78					94	hsa-miR-30e-3p	1310	-0.124
	95	hsa-miR-664b-3p	1282	-0.08					95	hsa-miR-181c-5p	1678	-0.798					95	hsa-miR-133b	1313	-0.135
	96	hsa-miR-892b	1288	-0.093					96	hsa-miR-6846-3p	1688	-0.819					96	hsa-miR-196a-5p	1314	-0.135
	97	hsa-miR-154-5p	1289	-0.094					97	hsa-miR-518c-3p	1699	-0.841					97	hsa-miR-628-3p	1322	-0.146
	98	hsa-miR-324-5p	1300	-0.11					98	hsa-miR-141-3p	1709	-0.854					98	hsa-miR-15a-5p	1325	-0.157
	99	hsa-miR-30e-3p	1310	-0.124					99	hsa-miR-17-5p	1712	-0.859					99	hsa-let-7i-5p	1326	-0.158
	100	hsa-miR-133b	1313	-0.135					100	hsa-miR-26a-5p	1716	-0.864					100	hsa-miR-106b-5p	1330	-0.164
	101	hsa-miR-196a-5p	1314	-0.135					101	hsa-miR-1306-3p	1736	-0.899					101	hsa-miR-146a-5p	1331	-0.164
	102	hsa-miR-186-5p	1321	-0.146					102	hsa-miR-195-5p	1741	-0.909					102	hsa-miR-29c-3p	1354	-0.214
	103	hsa-miR-628-3p	1322	-0.146					103	hsa-let-7a-5p	1748	-0.92					103	hsa-miR-208a-3p	1361	-0.215
	104	hsa-miR-15a-5p	1325	-0.157					104	hsa-miR-423-5p	1754	-0.929					104	hsa-miR-30d-3p	1365	-0.215
	105	hsa-miR-106b-5p	1330	-0.164					105	hsa-miR-654-3p	1757	-0.932					105	hsa-miR-203a-3p	1372	-0.233
	106	hsa-miR-146a-5p	1331	-0.164					106	hsa-miR-15b-5p	1762	-0.945					106	hsa-let-7f-5p	1374	-0.239
	107	hsa-miR-505-5p	1335	-0.171					107	hsa-miR-296-3p	1777	-0.974					107	hsa-miR-3144-3p	1390	-0.257
	108	hsa-miR-483-3p	1344	-0.198					108	hsa-let-7e-5p	1778	-0.975					108	hsa-miR-134-5p	1395	-0.271
	109	hsa-miR-6069	1347	-0.209					109	hsa-miR-130a-3p	1801	-1.036					109	hsa-miR-449a	1397	-0.274
	110	hsa-miR-302b-3p	1348	-0.211					110	hsa-miR-487b-3p	1815	-1.076					110	hsa-let-7c-5p	1409	-0.295
	111	hsa-miR-29c-3p	1354	-0.214					111	hsa-miR-24-3p	1843	-1.161					111	hsa-miR-7845-5p	1417	-0.308
	112	hsa-miR-4766-5p	1362	-0.215					112	hsa-miR-744-5p	1844	-1.17					112	hsa-miR-424-5p	1431	-0.34
	113	hsa-miR-30d-3p	1365	-0.215					113	hsa-miR-34c-5p	1845	-1.176					113	hsa-miR-34a-3p	1435	-0.348
	114	hsa-miR-203a-3p	1372	-0.233					114	hsa-miR-299-5p	1846	-1.178					114	hsa-miR-204-5p	1440	-0.355
	115	hsa-let-7f-5p	1374	-0.239					115	hsa-let-7b-5p	1847	-1.179					115	hsa-miR-326	1441	-0.36
	116	hsa-miR-219a-1-3p	1376	-0.243					116	hsa-miR-30b-5p	1854	-1.202					116	hsa-miR-126-3p	1446	-0.372
	117	hsa-miR-484	1379	-0.245					117	hsa-miR-214-3p	1856	-1.203					117	hsa-miR-133a-3p	1451	-0.378
	118	hsa-miR-1179	1388	-0.256					118	hsa-miR-101-3p	1876	-1.302					118	hsa-miR-4524a-5p	1453	-0.383
	119	hsa-miR-3144-3p	1390	-0.257					119	hsa-miR-494-3p	1896	-1.362					119	hsa-miR-27a-3p	1461	-0.391
	120	hsa-miR-584-5p	1391	-0.26					120	hsa-miR-145-5p	1901	-1.39					120	hsa-miR-16-5p	1463	-0.398
	121	hsa-miR-134-5p	1395	-0.271					121	hsa-miR-376c-3p	1904	-1.398					121	hsa-miR-200a-3p	1464	-0.403
	122	hsa-miR-449a	1397	-0.274					122	hsa-miR-30d-5p	1905	-1.415					122	hsa-miR-92a-3p	1466	-0.406
	123	hsa-let-7c-5p	1409	-0.295					123	hsa-miR-218-5p	1927	-1.553					123	hsa-miR-497-5p	1472	-0.415
	124	hsa-miR-4507	1413	-0.301					124	hsa-miR-124-3p	1944	-1.758					124	hsa-miR-29c-5p	1473	-0.418
	125	hsa-miR-23a-3p	1420	-0.313					125	hsa-miR-323a-3p	1955	-1.884					125	hsa-miR-224-5p	1477	-0.425
	126	hsa-miR-590-5p	1426	-0.327					126	hsa-miR-31-5p	1965	-2.398					126	hsa-miR-125a-5p	1481	-0.432
	127	hsa-miR-424-5p	1431	-0.34													127	hsa-miR-18a-5p	1483	-0.438
	128	hsa-miR-34a-3p	1435	-0.348													128	hsa-let-7g-5p	1485	-0.438
	129	hsa-miR-550a-3p	1442	-0.361													129	hsa-miR-499a-5p	1516	-0.502
	130	hsa-miR-126-3p	1446	-0.372													130	hsa-miR-181a-5p	1519	-0.505
	131	hsa-miR-133a-3p	1451	-0.378													131	hsa-miR-4458	1524	-0.523
	132	hsa-miR-27a-3p	1461	-0.391													132	hsa-miR-27b-3p	1533	-0.539
	133	hsa-miR-16-5p	1463	-0.398													133	hsa-miR-145-3p	1552	-0.565
	134	hsa-miR-200a-3p	1464	-0.403													134	hsa-miR-18b-5p	1556	-0.572
	135	hsa-miR-92a-3p	1466	-0.406													135	hsa-miR-378a-3p	1559	-0.575
	136	hsa-miR-497-5p	1472	-0.415													136	hsa-miR-504-5p	1570	-0.592
	137	hsa-miR-224-5p	1477	-0.425													137	hsa-miR-132-3p	1571	-0.592
	138	hsa-miR-125a-5p	1481	-0.432													138	hsa-miR-1268a	1572	-0.594
	139	hsa-miR-18a-5p	1483	-0.438													139	hsa-miR-142-5p	1576	-0.597
	140	hsa-miR-19b-3p	1484	-0.438													140	hsa-miR-140-5p	1580	-0.6
	141	hsa-let-7g-5p	1485	-0.438													141	hsa-miR-1181	1591	-0.639
	142	hsa-miR-301b-3p	1500	-0.469													142	hsa-miR-491-5p	1593	-0.644
	143	hsa-miR-320b	1510	-0.493													143	hsa-miR-148b-3p	1596	-0.655
	144	hsa-miR-181a-5p	1519	-0.505													144	hsa-miR-330-3p	1598	-0.66
	145	hsa-miR-503-3p	1525	-0.524													145	hsa-miR-95-3p	1605	-0.668
	146	hsa-miR-27b-3p	1533	-0.539													146	hsa-miR-718	1614	-0.686
	147	hsa-miR-103a-3p	1535	-0.542													147	hsa-miR-543	1617	-0.69
	148	hsa-miR-378a-3p	1559	-0.575													148	hsa-miR-194-5p	1626	-0.704
	149	hsa-miR-504-5p	1570	-0.592													149	hsa-miR-148b-5p	1627	-0.705
	150	hsa-miR-140-5p	1580	-0.6													150	hsa-miR-139-5p	1630	-0.71
	151	hsa-miR-320c	1587	-0.628													151	hsa-miR-4632-3p	1632	-0.711
	152	hsa-miR-491-5p	1593	-0.644													152	hsa-miR-20a-5p	1642	-0.725
	153	hsa-miR-543	1617	-0.69													153	hsa-miR-199a-5p	1643	-0.725
	154	hsa-miR-194-5p	1626	-0.704													154	hsa-miR-30c-5p	1664	-0.776
	155	hsa-miR-92a-1-5p	1636	-0.715													155	hsa-miR-20b-5p	1666	-0.778
	156	hsa-miR-20a-5p	1642	-0.725													156	hsa-miR-200c-3p	1667	-0.78
	157	hsa-miR-199a-5p	1643	-0.725													157	hsa-miR-195-3p	1668	-0.782
	158	hsa-miR-766-3p	1650	-0.744													158	hsa-miR-181c-5p	1678	-0.798
	159	hsa-miR-629-3p	1662	-0.768													159	hsa-miR-143-3p	1698	-0.84
	160	hsa-miR-130a-5p	1663	-0.77													160	hsa-miR-518c-3p	1699	-0.841
	161	hsa-miR-30c-5p	1664	-0.776													161	hsa-miR-107	1702	-0.845
	162	hsa-miR-20b-5p	1666	-0.778													162	hsa-miR-141-3p	1709	-0.854
	163	hsa-miR-200c-3p	1667	-0.78													163	hsa-miR-17-5p	1712	-0.859
	164	hsa-miR-423-3p	1673	-0.791													164	hsa-miR-26a-5p	1716	-0.864
	165	hsa-miR-181c-5p	1678	-0.798													165	hsa-miR-195-5p	1741	-0.909
	166	hsa-miR-522-5p	1681	-0.802													166	hsa-miR-433-3p	1744	-0.913
	167	hsa-miR-519b-5p	1693	-0.831													167	hsa-let-7a-5p	1748	-0.92
	168	hsa-miR-524-5p	1695	-0.835													168	hsa-miR-184	1749	-0.924
	169	hsa-miR-143-3p	1698	-0.84													169	hsa-miR-129-2-3p	1759	-0.936
	170	hsa-miR-107	1702	-0.845													170	hsa-miR-15b-5p	1762	-0.945
	171	hsa-miR-17-5p	1712	-0.859													171	hsa-miR-23b-3p	1768	-0.952
	172	hsa-miR-199b-5p	1713	-0.861													172	hsa-miR-205-5p	1769	-0.954
	173	hsa-miR-26a-5p	1716	-0.864													173	hsa-miR-369-5p	1774	-0.965
	174	hsa-miR-149-5p	1721	-0.876													174	hsa-let-7e-5p	1778	-0.975
	175	hsa-miR-515-5p	1728	-0.887													175	hsa-miR-17-3p	1780	-0.988
	176	hsa-miR-23c	1733	-0.897													176	hsa-miR-128-3p	1795	-1.024
	177	hsa-miR-195-5p	1741	-0.909													177	hsa-miR-379-3p	1796	-1.024
	178	hsa-miR-548t-3p	1746	-0.915													178	hsa-miR-130a-3p	1801	-1.036
	179	hsa-let-7a-5p	1748	-0.92													179	hsa-miR-34b-5p	1805	-1.04
	180	hsa-miR-184	1749	-0.924													180	hsa-miR-191-5p	1814	-1.069
	181	hsa-miR-654-3p	1757	-0.932													181	hsa-miR-487b-3p	1815	-1.076
	182	hsa-miR-15b-5p	1762	-0.945													182	hsa-miR-3648	1818	-1.079
	183	hsa-miR-23b-3p	1768	-0.952													183	hsa-miR-24-3p	1843	-1.161
	184	hsa-miR-205-5p	1769	-0.954													184	hsa-miR-744-5p	1844	-1.17
	185	hsa-miR-296-3p	1777	-0.974													185	hsa-miR-34c-5p	1845	-1.176
	186	hsa-let-7e-5p	1778	-0.975													186	hsa-let-7b-5p	1847	-1.179
	187	hsa-miR-485-3p	1779	-0.979													187	hsa-miR-3158-5p	1848	-1.181
	188	hsa-miR-17-3p	1780	-0.988													188	hsa-miR-214-3p	1856	-1.203
	189	hsa-miR-361-5p	1789	-1.005													189	hsa-miR-31-3p	1862	-1.223
	190	hsa-miR-548aa	1797	-1.028													190	hsa-miR-101-3p	1876	-1.302
	191	hsa-miR-98-3p	1800	-1.03													191	hsa-miR-494-3p	1896	-1.362
	192	hsa-miR-130a-3p	1801	-1.036													192	hsa-miR-574-3p	1897	-1.363
	193	hsa-miR-34b-5p	1805	-1.04													193	hsa-miR-206	1898	-1.369
	194	hsa-miR-487b-3p	1815	-1.076													194	hsa-miR-145-5p	1901	-1.39
	195	hsa-miR-24-3p	1843	-1.161													195	hsa-miR-376c-3p	1904	-1.398
	196	hsa-miR-744-5p	1844	-1.17													196	hsa-let-7d-5p	1907	-1.422
	197	hsa-miR-34c-5p	1845	-1.176													197	hsa-miR-34b-3p	1921	-1.519
	198	hsa-let-7b-5p	1847	-1.179													198	hsa-miR-218-5p	1927	-1.553
	199	hsa-miR-30b-5p	1854	-1.202													199	hsa-miR-124-3p	1944	-1.758
	200	hsa-miR-214-3p	1856	-1.203													200	hsa-miR-199a-3p	1950	-1.81
	201	hsa-miR-1297	1868	-1.245													201	hsa-miR-323a-3p	1955	-1.884
	202	hsa-miR-101-3p	1876	-1.302													202	hsa-miR-490-5p	1956	-1.907
	203	hsa-miR-33a-3p	1888	-1.338													203	hsa-miR-105-5p	1961	-2.178
	204	hsa-miR-494-3p	1896	-1.362													204	hsa-miR-135b-5p	1963	-2.256
	205	hsa-miR-574-3p	1897	-1.363													205	hsa-miR-31-5p	1965	-2.398
	206	hsa-miR-206	1898	-1.369
	207	hsa-miR-145-5p	1901	-1.39
	208	hsa-miR-376c-3p	1904	-1.398
	209	hsa-let-7d-5p	1907	-1.422
	210	hsa-miR-34b-3p	1921	-1.519
	211	hsa-miR-493-3p	1931	-1.622
	212	hsa-miR-331-5p	1948	-1.805
	213	hsa-miR-199a-3p	1950	-1.81
	214	hsa-miR-323a-3p	1955	-1.884
	215	hsa-miR-31-5p	1965	-2.398
